# Supplementary material for: Elevated on-treatment levels of serum IFN-gamma is associated with treatment failure of peginterferon plus ribavirin therapy for chronic hepatitis C
Source: PubMed Central journal article supplement (PMC4786849; doi:10.1038/srep22995), 2016-03-11
Supplement: srep22995-s1.pdf [file srep22995-s1.pdf]

# **Elevated on-treatment levels of serum IFN-gamma is associated with treatment failure of peginterferon plus ribavirin therapy for chronic hepatitis C**

Authors:

Ming-Ying Lu, MD<sup>7</sup>; Ching-I Huang, MD<sup>4</sup>; Chia-Yen Dai, MD, PhD<sup>1,2,7</sup>; Shu-Chi Wang, PhD<sup>1,6</sup>; Ming-Yen Hsieh, MD<sup>1</sup>; Meng-Hsuan Hsieh, MD<sup>2,6</sup>; Po-Cheng Liang, MD<sup>1</sup>; Yi-Hung Lin, MD<sup>1</sup>; Nai-Jen Hou, MD<sup>4</sup>; Ming-Lun Yeh, MD<sup>1,2,7</sup>; Chung-Feng Huang, MD<sup>1,2,5</sup>; Zu-Yau Lin, MD<sup>1,2</sup>; Shinn-Cherng Chen, MD, PhD<sup>1,2</sup>; Jee-Fu Huang, MD, PhD<sup>1,2</sup>; Wan-Long Chuang, MD, PhD<sup>1,2\*</sup>; Ming-Lung Yu, MD, PhD<sup>1,2,3\*</sup>

Affiliations:

<sup>1</sup>Hepatobiliary Division, Department of Internal Medicine and Hepatitis Center, Kaohsiung Medical University Hospital, Kaohsiung, Taiwan.

<sup>2</sup>Faculty of Internal Medicine, College of Medicine, and Graduate Institute of Clinical Medicine, and Center for Infectious Disease and Cancer Research, Kaohsiung Medical University, Kaohsiung, Taiwan.

<sup>3</sup>Institute of Biomedical Sciences, National Sun Yat-Sen University, Kaohsiung, Taiwan.

<sup>4</sup>Department of Internal Medicine, Kaohsiung Municipal Hsiao-Kang Hospital,

Kaohsiung Medical University, Kaohsiung, Taiwan.

<sup>5</sup>Department of Occupational Medicine, Kaohsiung Municipal Ta-Tung Hospital,

Kaohsiung Medical University, Kaohsiung, Taiwan.

<sup>6</sup>Department of Preventive Medicine, Kaohsiung Medical University Hospital,

Kaohsiung, Taiwan.

<sup>7</sup>Graduate Institute of Medicine, College of Medicine, Kaohsiung Medical University,

Kaohsiung, Taiwan

\*Corresponding author: Ming-Lung Yu, M.D., Ph.D.

Hepatobiliary Division, Department of Internal Medicine, Kaohsiung Medical

University Hospital, Kaohsiung, Taiwan

Tel: +886-7-312-1101 ext. 7475

Fax: +886-7-312-3955

Email: fish6069@gmail.com

Supplementary Table 1. Baseline serum cytokine expression levels between SVR and non-SVR

| Cytokine                             | SVR              | non-SVR           | p-value |
|--------------------------------------|------------------|-------------------|---------|
| IFN- $\gamma$ (pg/ml, mean $\pm$ SE) | 102.4 $\pm$ 20.7 | 147.8 $\pm$ 50.3  | 0.355   |
| IL-2 (pg/ml)                         | 52.7 $\pm$ 6.2   | 86.9 $\pm$ 13.8   | 0.017   |
| TNF- $\alpha$ (log pg/ml)            | 1.66 $\pm$ 0.11  | 1.45 $\pm$ 0.20   | 0.389   |
| IL-4 (pg/ml)                         | 363.1 $\pm$ 61.3 | 649.1 $\pm$ 139.1 | 0.040   |
| IL-5 (pg/ml)                         | 126.7 $\pm$ 22.9 | 146.2 $\pm$ 47.2  | 0.696   |
| IL-6 (log pg/ml)                     | 0.74 $\pm$ 0.20  | 0.31 $\pm$ 0.29   | 0.226   |
| IL-10 (log pg/ml)                    | 0.92 $\pm$ 0.17  | 0.77 $\pm$ 0.26   | 0.674   |
| IL-1 $\beta$ (log pg/ml)             | 0.86 $\pm$ 0.09  | 1.24 $\pm$ 0.28   | 0.219   |
| IL-8 (log pg/ml)                     | 1.43 $\pm$ 0.16  | 0.99 $\pm$ 0.22   | 0.117   |
| IL-12 (pg/ml)                        | 55.7 $\pm$ 20.9  | 46.2 $\pm$ 24.1   | 0.813   |

Supplementary Table 2. Serial serum cytokine expression levels between RVR and non-RVR

|                                      | RVR              | Non-RVR           | p-value |
|--------------------------------------|------------------|-------------------|---------|
| IFN- $\gamma$ (pg/ml, mean $\pm$ SE) |                  |                   |         |
| baseline                             | 108.1 $\pm$ 23.9 | 116.3 $\pm$ 32.8  | 0.839   |
| 2 week                               | 89.2 $\pm$ 17.2  | 160.8 $\pm$ 43.8  | 0.136   |
| 4 week                               | 92.6 $\pm$ 15.3  | 124.8 $\pm$ 32.1  | 0.315   |
| IL-2 (pg/ml)                         |                  |                   |         |
| baseline                             | 57.1 $\pm$ 6.8   | 64.2 $\pm$ 10.9   | 0.583   |
| 2 week                               | 84.4 $\pm$ 11.7  | 87.6 $\pm$ 11.9   | 0.857   |
| 4 week                               | 102.3 $\pm$ 15.3 | 97.0 $\pm$ 24.0   | 0.846   |
| TNF- $\alpha$ (log pg/ml)            |                  |                   |         |
| baseline                             | 1.57 $\pm$ 0.12  | 1.71 $\pm$ 0.16   | 0.472   |
| 2 week                               | 1.60 $\pm$ 0.11  | 1.74 $\pm$ 0.16   | 0.47    |
| 4 week                               | 1.73 $\pm$ 0.14  | 1.63 $\pm$ 0.16   | 0.635   |
| IL-4 (pg/ml)                         |                  |                   |         |
| baseline                             | 382.8 $\pm$ 72.8 | 494.9 $\pm$ 95.9  | 0.35    |
| 2 week                               | 314.3 $\pm$ 44.4 | 463.6 $\pm$ 101.5 | 0.134   |
| 4 week                               | 350.9 $\pm$ 42.4 | 384.4 $\pm$ 75.7  | 0.701   |
| IL-5 (pg/ml)                         |                  |                   |         |
| baseline                             | 122.8 $\pm$ 24.9 | 144.3 $\pm$ 36.1  | 0.614   |
| 2 week                               | 130.3 $\pm$ 24.9 | 231.1 $\pm$ 58.7  | 0.123   |
| 4 week                               | 161.4 $\pm$ 31.6 | 147.4 $\pm$ 43.6  | 0.792   |
| IL-6 (log pg/ml)                     |                  |                   |         |
| baseline                             | 0.73 $\pm$ 0.22  | 0.51 $\pm$ 0.26   | 0.511   |
| 2 week                               | 0.74 $\pm$ 0.21  | 0.57 $\pm$ 0.24   | 0.588   |
| 4 week                               | 0.64 $\pm$ 0.20  | 0.44 $\pm$ 0.23   | 0.525   |
| IL-10 (log pg/ml)                    |                  |                   |         |
| baseline                             | 0.98 $\pm$ 0.19  | 0.78 $\pm$ 0.22   | 0.507   |
| 2 week                               | 1.04 $\pm$ 0.21  | 1.05 $\pm$ 0.22   | 0.983   |
| 4 week                               | 0.92 $\pm$ 0.19  | 0.81 $\pm$ 0.21   | 0.68    |
| IL-1 $\beta$ (log pg/ml)             |                  |                   |         |
| baseline                             | 0.94 $\pm$ 0.11  | 0.96 $\pm$ 0.17   | 0.926   |
| 2 week                               | 0.81 $\pm$ 0.10  | 0.95 $\pm$ 0.15   | 0.442   |
| 4 week                               | 0.99 $\pm$ 0.11  | 0.95 $\pm$ 0.14   | 0.82    |
| IL-8 (log pg/ml)                     |                  |                   |         |
| baseline                             | 1.34 $\pm$ 0.18  | 1.32 $\pm$ 0.22   | 0.94    |
| 2 week                               | 1.28 $\pm$ 0.16  | 1.10 $\pm$ 0.17   | 0.44    |
| 4 week                               | 1.32 $\pm$ 0.18  | 0.97 $\pm$ 0.17   | 0.157   |
| IL-12 (pg/ml)                        |                  |                   |         |
| baseline                             | 64.1 $\pm$ 25.6  | 36.4 $\pm$ 15.2   | 0.429   |
| 2 week                               | 60.1 $\pm$ 20.8  | 66.1 $\pm$ 26.5   | 0.858   |
| 4 week                               | 28.5 $\pm$ 7.3   | 37.7 $\pm$ 20.8   | 0.626   |

Supplementary Table 3. The association between IFN- $\gamma$  and SVR in HCV patients

| IFN- $\gamma$ (pg/ml) | SVR<br>(n=69) | Non-SVR<br>(n=10) | X2 or Fisher's<br>p-value | Multivariate p-value |                      |
|-----------------------|---------------|-------------------|---------------------------|----------------------|----------------------|
|                       |               |                   |                           | OR (95% C.I)         | p-value              |
| IFN- $\gamma$ 4wk     |               |                   |                           |                      |                      |
| < 180                 | 61 (92.4%)    | 5 (7.6%)          | $2.2 \times 10^{-3}$      | 9.35 (1.63~53.66)    | 0.012                |
| $\geq$ 180            | 8 (61.5%)     | 5 (38.5%)         |                           |                      |                      |
| IFN- $\gamma$ 12wk    |               |                   |                           |                      |                      |
| < 120                 | 51 (94.4%)    | 3 (5.6%)          | $9.4 \times 10^{-3}$      | 13.19 (2.50~69.52)   | $2.4 \times 10^{-3}$ |
| $\geq$ 120            | 18 (72.0%)    | 7 (28.0%)         |                           |                      |                      |
| IFN- $\gamma$ EOT     |               |                   |                           |                      |                      |
| < 40                  | 50 (94.3%)    | 3 (5.7%)          | 0.012                     | 6.85 (1.47~32.06)    | 0.014                |
| $\geq$ 40             | 19 (73.1%)    | 7 (26.9%)         |                           |                      |                      |

p.s. (1) HCV-1b patients with non-RVR treated less than 48 weeks PegIFN/RBV therapy were excluded. (2) Adjusted for GPT and viral load. (3) EOT: end of treatment.

Supplementary Figure 1. Area under the serial IFN- $\gamma$  expression curve during PegIFN/RBV therapy

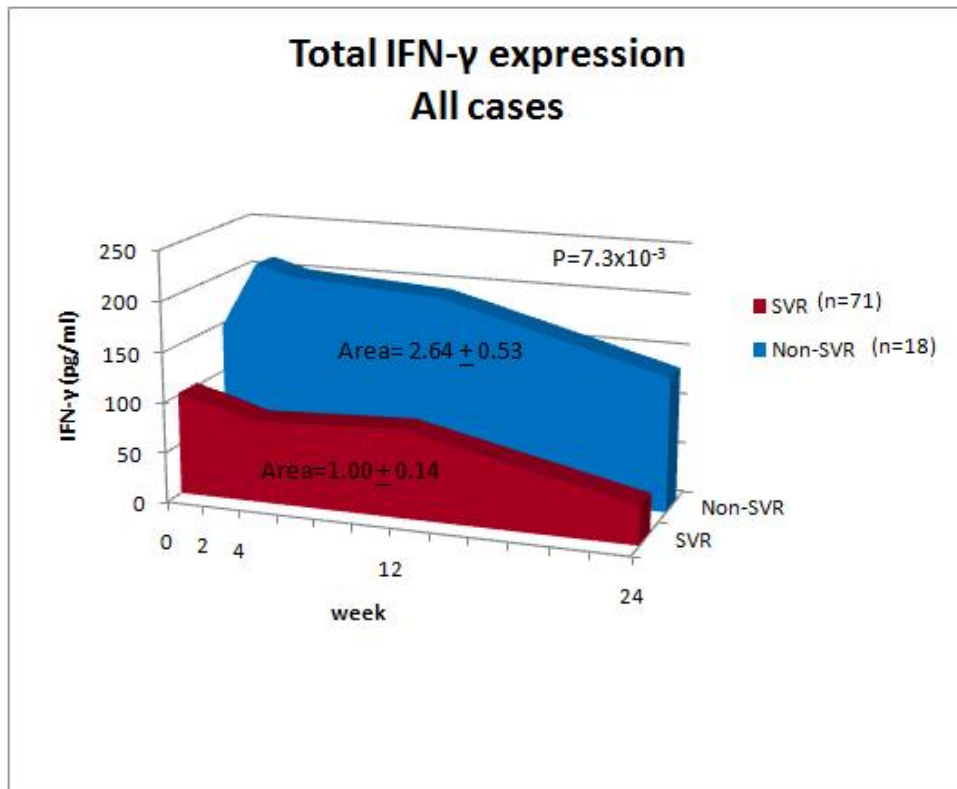

Supplementary Figure 2. The fold change of IFN- $\gamma$  between SVR and non-SVR

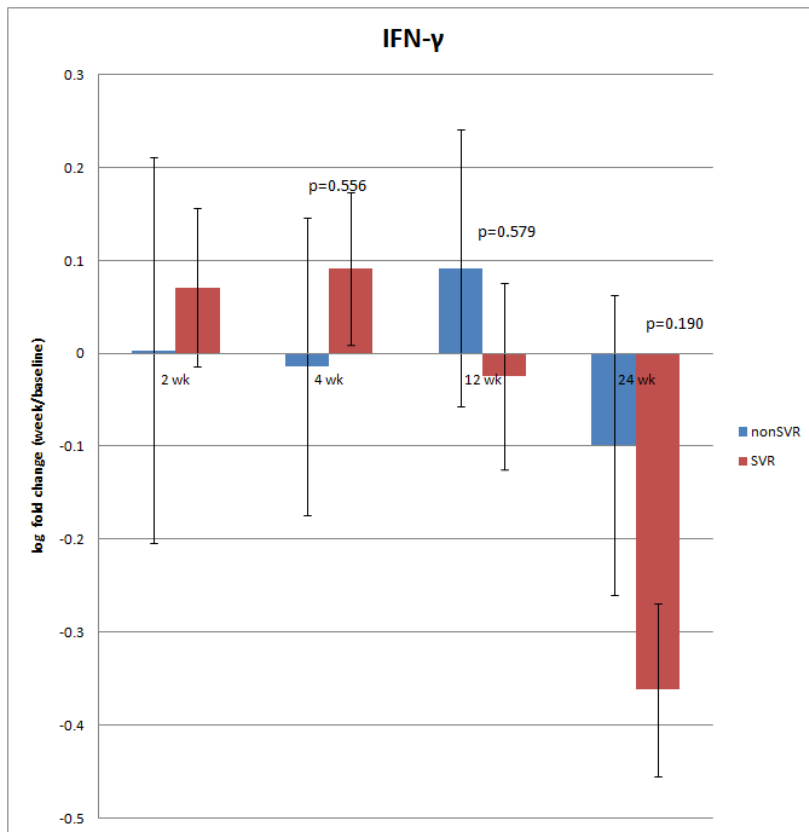

**Author contributions**

MY.L. and CY.D. designed the study and wrote the main manuscript text. SC.W. performed the experiments and prepared the figures. MY.H., CI.H., MH.H., PC.L., YH.L., NJ.H., ML.Y., CF.H., ZY.L., SC.C., and JF.H. collected the clinical data. ML.Y. and WL.C. designed the study and supervised the statistics. All authors have reviewed the manuscript.
